1  
2  
3  
4  
5  
6  
7  
8  
9  
10  
11  
12  
13  
14  
15  
16  
17  
18  
19  
20  
21  
22  
23  
24  
25  
26

**RNA binding to human METTL3-METTL14 restricts *N*<sup>6</sup>-deoxyadenosine methylation of  
DNA *in vitro***

Shan Qi<sup>1,2,#</sup>, Javier Mota<sup>1,#</sup>, Siu-Hong Chan<sup>3</sup>, Johanna Villarreal<sup>1</sup>, Nan Dai<sup>3</sup>, Shailee Arya<sup>1</sup>,  
Robert A. Hromas<sup>4</sup>, Manjeet K. Rao<sup>1</sup>, Ivan R. Corrêa Jr.<sup>3</sup>, Yogesh K. Gupta<sup>1,2,5\*</sup>

<sup>1</sup> Greehey Children’s Cancer Research Institute, University of Texas Health at San Antonio  
8403 Floyd Curl Drive, San Antonio, TX 78229, USA

<sup>2</sup> Department of Biochemistry and Structural Biology, University of Texas Health at San Antonio  
7703 Floyd Curl Drive, San Antonio, TX 78229, USA

<sup>3</sup> New England Biolabs, 240 County Road, Ipswich, MA, 01938, USA

<sup>4</sup> Division of Hematology and Medical Oncology, Department of Medicine, University of Texas  
Health at San Antonio  
7703 Floyd Curl Drive, San Antonio, TX 78229, USA

<sup>5</sup> Lead contact

\*Corresponding author:

Y.K.G email: [guptay@uthscsa.edu](mailto:guptay@uthscsa.edu)

# These authors contributed equally to this work

27 **Abstract**

28 Methyltransferase like-3 (METTL3) and METTL14 complex transfers a methyl group from *S*-  
29 adenosyl-L-methionine to *N*<sup>6</sup> amino group of adenosine bases in RNA (m<sup>6</sup>A) and DNA (m<sup>6</sup>dA).  
30 Emerging evidence highlights a role of METTL3-METTL14 in the chromatin context, especially  
31 in processes where DNA and RNA are held in close proximity. However, a mechanistic framework  
32 about specificity for substrate RNA/DNA and their interrelationship remain unclear. By  
33 systematically studying methylation activity and binding affinity to a number of DNA and RNA  
34 oligos with different propensities to form inter- or intra-molecular duplexes or single-stranded  
35 molecules *in vitro*, we uncover an inverse relationship for substrate binding and methylation and  
36 show that METTL3-METTL14 preferentially catalyzes the formation of m<sup>6</sup>dA in single-stranded  
37 DNA (ssDNA), despite weaker binding affinity to DNA. In contrast, it binds structured RNAs with  
38 high affinity, but methylates the target adenosine in RNA (m<sup>6</sup>A) much less efficiently than it does  
39 in ssDNA. We also show that METTL3-METTL14-mediated methylation of DNA is largely  
40 regulated by structured RNA elements prevalent in long noncoding and other cellular RNAs.

41

## 42 Introduction

43

44 *N*<sup>6</sup>-methyladenosine (m<sup>6</sup>A) is considered a major covalent modification of the adenosine (A) base  
45 in coding and noncoding (nc) RNAs<sup>1-5</sup>. It is linked to diverse physiologic processes, including –  
46 but not limited to – RNA turnover<sup>6-8</sup>, stem cell differentiation<sup>9, 10</sup>, oncogenic translation<sup>11-14</sup>, and  
47 DNA damage repair<sup>15, 16</sup>. In human cells, most m<sup>6</sup>A in cellular RNAs is installed by METTL3 and  
48 METTL14 methyltransferases<sup>2, 4, 17</sup>, both of which belong to the β-class of *S*-adenosyl methionine  
49 (SAM)-dependent methyltransferases (*N*<sup>6</sup>-MTases)<sup>18, 19</sup> that also include *N*<sup>6</sup>-deoxyadenosine  
50 DNA methyltransferases (m<sup>6</sup>dA MTases), especially those from Type III restriction-modification  
51 (R-M) systems in bacteria (e.g. Mod<sub>A/B</sub> dimer of EcoP15I)<sup>20</sup>. The first structures of METTL3-  
52 METTL14 complexes suggested common features in EcoP15I and METTL3-METTL14<sup>21, 22</sup>. We  
53 analyzed these MTases and found high structural similarity of the cores of human METTL3,  
54 METTL14, and EcoP15I, suggesting their evolutionary origin from a common ancestor (fig. 1 a-  
55 e and supplementary fig. 1).

56

57 While m<sup>6</sup>dA in bacterial DNA is deposited in a strictly sequence-dependent manner in double-  
58 stranded DNA (dsDNA)<sup>20, 23</sup>, m<sup>6</sup>A in RNA by human METTL3-METTL14 shows less stringent  
59 sequence dependency for sequences flanking the target **A** within the recognition motif DRACH  
60 (D=A/G/U, R=A/G, H=A/C/U)<sup>2, 17, 24</sup>. Such relaxed specificity maybe required to expand the  
61 repertoire of target transcripts of METTL3-METTL14. However, this does not correlate with low  
62 levels of m<sup>6</sup>A in cellular RNA, which remains at ~ 0.1% of total pool of ribonucleotides in cultured  
63 mammalian cells<sup>25</sup>. Of note, recent evidence suggests that all m<sup>6</sup>A is deposited co-  
64 transcriptionally, with most occurring on chromatin-associated RNAs, e.g., nascent pre-mRNA

65 (CA-RNA), promoter-associated RNA, enhancer RNA, and repeat RNA elements<sup>6-8, 26</sup>.  
66 Consistently, the METTL3-METTL14 m<sup>6</sup>A writers can be recruited to chromatin by modified  
67 histone tails (e.g., H3K36me3)<sup>27</sup> or the transcription machinery<sup>12, 26</sup>. Certain long noncoding (lnc)  
68 RNAs that are essential for regulated transcription, such as chromatin-associated *XIST*<sup>28</sup> and  
69 *NEAT2 (MALAT1)*<sup>29</sup>, also harbor m<sup>6</sup>A marks. A role of m<sup>6</sup>A in DNA damage response and repair  
70 has also been suggested<sup>16, 30</sup>. In those contexts, METTL3 localizes at sites of dsDNA breaks and  
71 installs the m<sup>6</sup>A on DNA-damage associated RNAs<sup>16</sup>. METTL3 is also emerged as a pro-viral host  
72 factor in SARS-CoV-2 pathogenesis. Consistently, genetic depletion or inhibition of METTL3 by  
73 small molecules triggers innate immune response and limits viral growth<sup>31, 32</sup>.

74

75 The increasingly appreciated roles of m<sup>6</sup>A in nucleic acid metabolism thus seem to converge to a  
76 common point: the occurrence of m<sup>6</sup>A at chromatin, a predominantly DNA- and RNA-rich  
77 environment inside the nucleus. A recent study showed that METTL3-METTL14 can convert dA  
78 to m<sup>6</sup>dA within equivalent DRACH (D=A/G/U, R=A/G, H=A/C/U) motif in a single-stranded  
79 DNA (ssDNA) with a 2.5-fold preference over the equivalent RNA *in vitro*<sup>33</sup>. Since m<sup>6</sup>dA levels  
80 in mammalian DNA are extremely low (0.006 to 0.01%) and thought to originate from RNA  
81 catabolism rather than from SAM-dependent MTase reactions<sup>34</sup>, fundamental questions about  
82 substrate(s) specificity and mechanisms of action of METTL3-METTL14 have emerged. By using  
83 classical biochemical and mass spectrometry assays, we show that METTL3-METTL14  
84 preferentially methylates N<sup>6</sup>dA on ssDNAs to m<sup>6</sup>dA, and this activity is largely regulated by  
85 structured RNA elements prevalent in long noncoding (lnc) RNAs, that are also found in other  
86 cellular RNAs. Thus, our work provides a framework to explore a new regulatory axis of RNA-  
87 mediated restriction of N<sup>6</sup>-deoxyadenosine (m<sup>6</sup>dA) methylation in mammalian genomes.

88

## 89 **Results**

90 We compared the MTase cores of (Mod<sub>B</sub>) of EcoP15I (aa 90 -132, 169 - 261, 385 – 511, PDB:  
91 4ZCF<sup>20</sup>) and METTL14 (aa 116 – 402, PDB: 5IL0<sup>21</sup>). A secondary structure-based superposition<sup>36</sup>  
92 of these two structures revealed common features and similar arrangement of canonical MTase  
93 motifs (motifs I, and IV-X), including the motif IV (D/EPPY/W/L) that surrounds the Watson-  
94 crick edge of the flipped target adenine base (fig. 1 a-e and supplementary fig. 1). Previous studies  
95 identified three loops encompassing the sequence intervening MTase motifs IV and V (loop 1),  
96 VIII and VIII' (loop 2), and motifs IX and X (loop 3) contribute to substrate binding<sup>21, 22, 35</sup>. Due  
97 to lack of experimental structures of METTL3 or Mod<sub>A</sub> (in complex with a flipped adenine base),  
98 we chose Mod<sub>B</sub> and METTL14 for this comparison. While the MTase domain of METTL14 is  
99 enzymatically inactive, it harbors features that contribute to substrate binding<sup>21, 22, 35</sup>. These  
100 observations prompted us to address the prevailing question about substrate specificity of the  
101 human full-length METTL3-METTL14 enzyme complex. We co-purified the full-length human  
102 METTL3-METTL14 complex and its truncated form devoid of the RGG motif of METTL14  
103 (METL3-METL14-RGG) from insect cells (see details in methods section) (fig. 1f). The RGG  
104 motifs are clustered sequences of arginines and glycines. These motifs are commonly present in  
105 diverse set of RNA binding proteins that play important roles in physiological processes, such as  
106 RNA synthesis and processing<sup>37</sup>. In human METTL14, a total of seven RGG triplets and two RG  
107 motifs are present at its c-terminus tail (aa 408-457). The region also harbors a number of aromatic  
108 amino acids, which can further stabilize the bound nucleic acids via hydrophobic or stacking  
109 interactions. Consistently, this region contributes to substrate binding and m<sup>6</sup>A activity of the

110 METTL3-METTL14 enzyme complex<sup>38</sup>. The sequence encompassing the RGG motifs in  
111 METTL14 is well conserved in higher vertebrates<sup>17</sup>.

112

113 Next, we designed RNA substrates of varied lengths (5 to 30 nucleotides) with at least one  
114 canonical m<sup>6</sup>A signature motif (RRACH), including an RNA oligo (rPal-Top+bat) in which two  
115 RRACH sites were arranged in a palindromic fashion (fig. 1g). We included a 14-mer DNA oligo  
116 (d6T) according to Woodcock et al<sup>33</sup> that reported that METTL3-METTL14 exhibited highest  
117 methyltransferase (MTase) activity on d6T. We also included two structured RNAs with  
118 propensity to form a perfect stem-loop (23-mer rTCE23 or also known as SRE<sup>39</sup>) without a  
119 DRACH motif, and a 30-mer rNEAT2 (or MALAT1) encompassing one DRACH motif and  
120 predicted to form a stem-loop with a bulged stem (fig. 1 h-i).

121

122 The m<sup>6</sup>A mark in mammalian RNAs is widespread and expands beyond internal adenines in  
123 mRNAs to lncRNAs (*XIST*<sup>28</sup>, *NEAT2* or *MALAT1*<sup>29</sup>), pri-miRNAs<sup>40</sup> and snoRNAs<sup>24</sup> – all of which  
124 are crucial to gene regulation and maintenance of cellular homeostasis. Of note, *NEAT2* lncRNA  
125 can relocate a large subset of transcription units across cellular compartments from polycomb  
126 bodies (PcGs) to interchromatin granules (ICGs)<sup>41</sup>. According to this model, a 49-nt long fragment  
127 of *NEAT2* (nt 4917-4966) facilitates the recruitment of a mega transcription complex<sup>41</sup>. We  
128 observed that this *NEAT2* fragment harbors one RRACH motif (AAACA) in its loop region and  
129 fulfils the criteria of m<sup>6</sup>A peak signature (RRACH<sup>2, 17</sup> or DRACH<sup>24</sup> or ACA<sup>42</sup>) (fig. 1g). Thus, we  
130 decided to test the activity of METTL3-METTL14 on this regulatory module of the lncRNA. For  
131 simplicity of synthesis and purification, we focused on a slightly shorter version (30-nt; *rNEAT2*-  
132 30) of *NEAT2-49* in which both the m<sup>6</sup>A signature motif and bulged stem regions were well

133 preserved (fig. 1g-h). The rTCE23 could serve as a control - it forms a perfect stem-loop structure  
134 in solution - confirmed by solution NMR previously<sup>39</sup> - but lacks a m<sup>6</sup>A signature motif (fig. 1g,  
135 i).

136

137 We observed higher enzymatic activity of METTL3-METTL14 on the d6T DNA oligo compared  
138 with its RNA counterpart (r6T) (fig. 2a, c). By closely examining the sequence of the 14-mer  
139 d6T/r6T, we found a propensity of these oligos to form duplex DNA (for d6T) or RNA (for r6T):  
140 6 of the 14 nucleotides at 5'-end will pair with a complementary sequence to create a duplex with  
141 an 8-nt overhang at the 3'-end of each strand (fig. 1g and 2d). As a result of this self-annealing,  
142 two adenine bases are available for methylation (m<sup>6</sup>dA) at the end of the short palindromic  
143 sequence (5'-CCG•CGG-3'). We thus hypothesized that d6T (or 6T, as referred to by Woodcock  
144 et al<sup>33</sup>) may not truly represent a ssDNA substrate. Thus, we designed a new DNA oligo (d6T\*) in  
145 which two nucleotides, a deoxycytidine and a deoxyguanosine at -3 and -2 positions (relative to  
146 the signature motif RRACH), respectively, were replaced by two thymidines to disrupt base  
147 pairing and palindrome formation without affecting the core RRACH motif required for m<sup>6</sup>dA  
148 installation (fig. 1g). We reasoned that if METTL3-METTL14 indeed prefers a ssDNA for  
149 methylation, it should show higher activity for d6T\*, a true ssDNA substrate, over d6T. Indeed,  
150 we found that the methyltransferase activity of METTL3-METTL14 towards d6T\* increased by  
151 2-fold compared with d6T (and >12-fold compared with r6T) (fig. 2a). Consistent with previous  
152 observations<sup>33</sup>, METTL3-METTL14 showed no activity in the presence of a perfect duplex version  
153 of d6T DNA (d6T-ds). These results confirm a robust activity of METTL3-METTL14 on ssDNA  
154 substrates.

155

156 We observed no methyltransferase activity on rTCE23 RNA, as expected; but surprisingly, some  
157 low (but consistently detectable) methyltransferase activity on *rNEAT2* (fig. 2a). We then asked  
158 what attributes (sequence, length, and shape) in an RNA substrate are critical for METTL3-  
159 METTL14 to yield a high methyltransferase activity. To answer this question, we designed eight  
160 RNA oligos with varied length (5- to 22-nt) and sequences (fig. 1g). We also varied the position  
161 of the RRACH motif and the flanking sequences in these oligos. All oligos comprised one RRACH  
162 motif, except the RNA duplex Pal-Top+bot, where two RRACH sites were arranged in a  
163 palindromic fashion within each 10-mer strand. We designed another variant of probe rC2-flip  
164 (22-mer, RRACH in the center), rC-flip wherein the RRACH motif resided at the 3'-end. The other  
165 three RNA oligos, FoxM1-p1 (13-nt, RRACH at 3'-end), c-Myc-p5 (8-nt), and c-Myc-p6 (11-nt,  
166 RRACH at 5'-end) were derived from the *FOXMI* and *MYC* genes because of their involvement  
167 in m<sup>6</sup>A-mediated processes in glioblastoma and acute myeloid leukemia<sup>13, 43</sup>. We covalently  
168 attached a fluorescein moiety at the 5'-end of all these oligos to facilitate the quantitative  
169 measurement of their binding affinities (equilibrium dissociation constant or K<sub>d</sub>) to METTL3-  
170 METTL14 (see methods section for details).

171

172 We used a radiometric assay and fluorescence polarization (FP) to determine methylation activity  
173 and RNA binding, respectively. As shown in fig. 2a,c, RNA oligos with high propensity toward  
174 forming secondary structures (rNEAT2, rTCE23, Pal-Top+bot) showed low to negligible levels of  
175 methylation by METTL3-METTL14. The other RNA oligos showed some levels of methylation,  
176 though they could not be methylated with as much efficiency as the ssDNA substrate, d6T\*. The  
177 results of binding experiments are shown in fig. 2b and table 1. The full-length METTL3-  
178 METTL14 binds to rNEAT2 with the highest affinity (K<sub>d</sub> = 2 nM), followed by the hairpin



179 rTCE23 (Kd = 25 nM), the 3'-overhang r6T (Kd = 114 nM), the palindromic Pal-Top+bot (Kd =  
180 127 nM), and the ssRNA FoxM1-p1 (Kd = 294 nM). Surprisingly, the DNA substrates (d6T and  
181 d6T\*) that showed highest methyltransferase activity were the poorest binders, with Kd values of  
182 370 and 509 nM, respectively.

183

184 If METTL3-METTL14 were to methylate ssDNA *in vivo*, and the evidence to date does not  
185 support its direct enzymatic origin<sup>34</sup>, then what could be the significance of high affinity RNA  
186 binding to structured RNA oligos (rNEAT2 and rTCE23)? One explanation is that structural motifs  
187 in ncRNA or mRNAs can serve as a recruitment platform for METTL3-METTL14 in a specific  
188 context. But how would the RNA binding activity then affect DNA methylation activity? To  
189 answer this question, we measured the methyltransferase activity of METTL3-METTL14 in the  
190 presence of roughly equimolar mixtures of d6T\* DNA with each RNA oligonucleotide. The  
191 methyltransferase activity of METTL3-METTL14 was significantly reduced in the presence of  
192 RNA (fig. 2c). Of note, RNAs with propensity to form secondary structures and highest binding  
193 affinity to METTL3-METTL14 (rNEAT2, rTCE23) attenuated methyltransferase activity to the  
194 most negligible levels (fig. 2c). To further explore the relationship between methyltransferase  
195 activity and substrate binding affinity, we synthesized a variant of the stem-loop oligo (rNEAT2\*)  
196 with the DRACH motif (5'- AAACA - 3') changed to an ideal m<sup>6</sup>A target sequence i.e. 5'-  
197 GGACU - 3' (fig. 1g). Although, higher methylation levels were observed for rNEAT2\* compared  
198 to rNEAT2, most likely attributed to a perfect GGACU motif in rNEAT2\*, yet the methylation  
199 was significantly lower than that of d6T\* DNA (last panel of fig. 2c). Moreover, rNEAT2\* showed  
200 ~6-fold reduction in affinity compared to rNEAT2 (fig. 2b). Importantly, rNEAT2\* also attenuated  
201 methylation of the single stranded d6T\* DNA by METTL3-METTL14 but to a lesser extent than

202 the rNEAT2 (fig. 2c). These results suggests that: a) the sequence and shape of the target RNAs  
203 dictate the m<sup>6</sup>A activity of METTL3-METTL14, and b) that higher affinity substrates tend to show  
204 lower methylation levels, possibly due to slow off rates of m<sup>6</sup>A RNA.

205

206 To further investigate RNA-mediated inhibition, we showed that the two structured RNAs  
207 (rTCE23 and rNEAT2) inhibited the DNA methylation activity of METTL3-METTL14 in a dose  
208 dependent manner, with rNEAT2 (IC<sub>50</sub> = 216 nM) showing 4-fold stronger inhibition than rTCE23  
209 (IC<sub>50</sub> = 887 nM) (fig. 2e). Next, we employed a LC/MS-based oligonucleotide intact mass analysis  
210 to further validate the results of the radiometric assay. As shown in fig. 2f, an equimolar (with  
211 respect to d6T\* DNA) addition of rNEAT2 or rTCE23 significantly reduced the methyltransferase  
212 activity from 80.5% to 14.5 and 7.3%, respectively. We then performed nucleoside analysis of the  
213 METTL3-METTL14 reactions to unambiguously determine the identity of methylated base and  
214 efficiency of methylation (fig. 2g). We confirmed that deoxyadenosine on d6T\* and adenosine on  
215 rNEAT2 were the only modified bases. In the absence of rNEAT2 or rTCE23, 86.3% of dAs on  
216 d6T\* were modified. When rNEAT2 or rTCE23 were present, only 14.4 and 7.4%, respectively,  
217 of dAs on d6T\* were modified. Additionally, 5.8% of the rAs on rNEAT2 were modified. As  
218 expected, no methylation on rTCE23 was detected (no RRACH motif). These results are consistent  
219 with those obtained by oligonucleotide intact mass analysis. Altogether, the methyltransferase and  
220 binding assays confirm that the binding to structured RNAs, especially those lacking the GGACU  
221 sequence, almost completely abolishes the methyltransferase activity METTL3-METTL14.

222

223 The c-terminal RGG repeat motif of METTL14 contributes to RNA binding and activity of  
224 METTL3-METTL14<sup>38</sup> (fig. 3a). Thus, we hypothesized that the absence of RGG motif in

225 METTL3-METTL14 should diminish its ability to bind RNA and consequently attenuate the effect  
226 of RNA on DNA methylation. In fact, we observed a 2- to 10-fold decrease in binding affinity by  
227 METTL3-METTL14<sub>-RGG</sub> (fig. 3b, and table 1). This suggests that the RGG motifs play a major  
228 role in RNA and DNA substrates, while other parts of the enzyme (e.g., CCCH-type zinc finger  
229 domains in METTL3<sup>44</sup> and MTase core of METTL14<sup>35</sup>) may also contribute to the overall binding  
230 (fig. 3b). As expected, the deletion of RGG caused 60% reduction in DNA methylation activity.  
231 In the presence of rNEAT2, the activity of METTL3-METTL14<sub>-RGG</sub> on d6T\* DNA was reduced  
232 to about 75% of its activity in absence of the RNA; comparatively, a >90% activity reduction was  
233 observed for the full-length METTL3-METTL14 in presence of the same RNA (fig. 3c). These  
234 results suggest that the RGG motif, as a general RNA binding domain, dictates the shape-specific  
235 RNA recognition and promotes an RNA-mediated restriction of the DNA methylation activity of  
236 METTL3-METTL14 (table 1).

237

238

## 239 **Discussion**

240

241 Our results are noteworthy given the relevance of METTL3-METTL14 in regions where RNA and  
242 DNA are held in closed proximity, as supported by recent studies suggesting: a) localization of  
243 METTL3 to sites of double-stranded DNA breaks, and its role in DNA/RNA hybrid  
244 accumulation<sup>16</sup>, b) recruitment of METTL3 to chromatin by promoter-bound transcription  
245 factors<sup>12</sup>, c) UV-induced DNA damage signaling<sup>30</sup>, and d) metabolism of R-loops<sup>45</sup>. Earlier studies  
246 suggest the existence of a large complex of multiple subunits of ~1 MDa size, possessing RNA  
247 N<sup>6</sup>-adenosine methylation activity distributed over two sub-complexes of approximate molecular

248 mass of ~200 and ~800 kDa<sup>2, 46</sup>. One such subunit is WTAP, which alters both the pattern and  
249 location of the m<sup>6</sup>A transcriptome<sup>47</sup>. Future studies could examine the role of WTAP and other  
250 partners of METTL3-METTL14 in substrate recognition and specificity, especially within the  
251 context of the regulatory role of RNA in DNA methylation.

252

253 In summary, we unveiled a new N<sup>6</sup>-deoxyadenosine methylation activity on ssDNA, which is  
254 regulated by binding of METTL3-METTL14 to shape-dependent structured regions of ncRNAs  
255 and chromatin-associated nascent pre-mRNAs (CA-RNA) (fig. 3d, e). The structured elements in  
256 RNA could facilitate the recruitment of METTL3-METTL14 to chromatin and/or keep the writer  
257 complex engaged during co-transcriptional occurrence of m<sup>6</sup>A. Such a topologic arrangement of  
258 METTL3-METTL14/RNA interaction could also restrict m<sup>6</sup>dA deposition, especially to the  
259 single-stranded regions of DNA exposed during transcription<sup>26</sup>, DNA recombination<sup>16</sup>, damage  
260 and repair<sup>15</sup>, and R-loop metabolism<sup>45</sup>.

261

262 A major difference in prokaryotic and eukaryotic genomes is the contrasting occurrence of the  
263 base methylation. The m<sup>6</sup>dA is a predominant modification mark in bacterial DNA, whereas the  
264 m<sup>5</sup>dC is more prevalent in eukaryotic genomes. How is the eukaryotic genome then protected from  
265 m<sup>6</sup>dA deposition despite having an efficient enzyme machinery (e.g., METTL3-METTL14) to  
266 accomplish such task? A comparative sequence/structural analysis of the bacterial EcoP15I and  
267 human METTL3 and METTL14 MTases provides some hints (fig. 1a-c, fig. 3a). Of note, there  
268 are two major differences that exist in the sequences of METTL3 and METTL14: a) loss of the  
269 target recognition domain (TRD) and b) acquisition of the RGG motif in METTL14. The TRD  
270 motif (in EcoP15I MTase) is a major contributor to binding and specificity for a dsDNA<sup>20</sup>, whereas

271 the RGG motif is known for RNA binding<sup>37</sup>. It is likely that gene fusion/genome arrangement  
272 event(s) could have occurred during evolution<sup>18, 19</sup> to ensure very low/no occurrence<sup>48</sup> of m<sup>6</sup>dA in  
273 mammalian genome. The high affinity to structured RNAs as demonstrated here could also ensure  
274 efficient recruitment of METTL3-METTL14 to specific nuclear compartment(s) in human cells.

275

276 Interestingly, a recent study showed that a comprehensive network of RNA-RNA and RNA-DNA  
277 interactions mediated by ncRNAs (including MALAT1) creates distinct nuclear compartments and  
278 facilitate recruitment of proteins for RNA processing, heterochromatin assembly, and gene  
279 regulation<sup>49</sup>. Thus, the secondary structure and 3D shape of the RNAs appears to be crucial for  
280 these important biological processes. In line with these observations, our results suggest that  
281 structured elements in RNAs may play an important role in regulating the ssDNA and ssRNA  
282 methylation activity of METTL3-METTL14.

283

## 284 **METHODS**

### 285 *Protein expression, purification, and oligonucleotide preparation*

286

287 The coding sequence of full-length human METTL3 (NCBI reference sequence GI: 33301371)  
288 was used in this study. The gene was cloned into a plasmid suitable for expression of proteins in  
289 insect cells with an N-terminal poly histidine tag followed by a tobacco etch virus (TEV) protease  
290 site. This plasmid (5TEY (METTL3) was a kind gift from Dr. Cheryl Arrowsmith (Addgene  
291 plasmid # 101892; <http://n2t.net/addgene:101892>; RRID:Addgene\_101892). The coding sequence  
292 of full-length human METTL14 (NCBI reference number GI: 172045930) was cloned into the  
293 pFastBac1 vector between BamHI and NotI restriction enzyme sites. For expression of  
294 recombinant proteins, we used ExpiSf Expression System (Thermo Fisher). First, the viral DNA  
295 bacmids for each gene were prepared from individual plasmids transformed into MAX  
296 Efficiency™ DH10Bac™ competent cells (Thermo Fisher). We confirmed the identity of the  
297 inserted genes by PCR amplification and DNA sequencing. The recombinant P0 virus for each  
298 gene were generated in ExpiSf9 insect cells following the manufacturer's recommendations  
299 (Thermo Fisher). The amount of each virus needed for infection has been optimized for maximal  
300 production of the two proteins. Infected cells were grown in ExpiSf CD medium (Thermo Fisher)  
301 at 27 °C on an orbital shaker (speed 125 rpm) in a controlled (non-humidified, air regulated)  
302 environment. Cells were harvested at 72 hours post-infection by spinning at 300 X g for 5 minutes,  
303 washed with phosphate buffered saline (PBS) twice, and resuspended in a buffer A (0.025 M Tris-  
304 HCl pH 8.0, 0.5 M NaCl, 0.005 M Imidazole, 0.1 mM TCEP, 10% [(v/v)] glycerol) supplemented  
305 with 0.5% (v/v) Igepal, 2 mini-protease inhibitor cocktail tablets (Roche), DNase I, and lysozyme.  
306 Cells were lysed using a microfluidizer (Analytik, UK) and the soluble fraction was separated by

307 centrifuging the lysate at 40,000 rpm for 40 minutes. The supernatant was passed through a 0.22  
308  $\mu\text{m}$  filter.

309 The clarified soluble fraction was loaded on to a Nuvia IMAC column (Bio-Rad) pre-equilibrated  
310 in buffer A. The proteins were eluted by increasing the concentration of imidazole. The 6XHis tag  
311 was then proteolytically removed using TEV protease. Any uncleaved fractions and remaining  
312 protein impurities were removed by second passage through an IMAC column. The METTL3-  
313 METTL14 complex was further purified by successive passage through HiTrap heparin and  
314 HiLoad Superdex 200 columns (GE Healthcare). The protein complex was eluted as a single  
315 homogenous species in a final buffer containing 0.02 M Tris-HCl pH 8.0, 0.15 M NaCl, 0.1 mM  
316 TCEP. The purified protein complex was concentrated to 3-5 mg/mL and used immediately, or  
317 flash frozen in liquid nitrogen and stored at  $-80\text{ }^{\circ}\text{C}$ . The METTL3-METT14-RGG complex lacks the  
318 c-terminus RGG repeats motif (amino acids 400 - 457) of METTL14. It was expressed and purified  
319 using same method as the full-length METTL3-METTL14 complex.

320 All RNA and DNA oligonucleotides oligonucleotides used in this study were synthesized, purified  
321 by HPLC, and received in deprotected (for RNAs) and desalted form from Dharmacon and  
322 Integrated DNA Technologies, respectively. Oligos were dissolved in 1X buffer containing 0.01  
323 M Tris-HCl pH 8.0, 0.05 M NaCl. To prepare double-stranded oligos, the two strands were mixed  
324 in roughly equimolar amounts. Annealing was carried out by heating the mixture to  $95\text{ }^{\circ}\text{C}$  for 2  
325 minutes followed by gradual cooling to  $25\text{ }^{\circ}\text{C}$  over 45 minutes in a thermocycler (Eppendorf).

326

327 *Methyltransferase assays*

328

329 *Radiometric assay*

330 Each reaction was carried out in a 5  $\mu$ L mixture containing 50 mM HEPES pH 7.5, 5 mM NaCl,  
331 1 mM dithiothreitol (DTT), 5  $\mu$ M [methyl-<sup>3</sup>H] S-adenosyl methionine (PerkinElmer), 10  $\mu$ M  
332 substrate RNA/DNA probe, and 1  $\mu$ M co-purified full-length METTL3-METTL14 enzyme  
333 complex. The reactions were incubated at 37 °C for 1 hour and 3  $\mu$ L of each reaction was quenched  
334 by blotting on Hybond-N+ membrane (Amersham). RNA/DNA probes were crosslinked to  
335 membrane by exposure to ultraviolet light (254 nm) for 2 minutes. The membranes were  
336 successively washed three times by 1X PBS followed by three ethanol washes for 5 minutes each.  
337 The membranes were air dried in the hood for 15 minutes and the counts per minute (c.p.m.) of  
338 the RNA/DNA probes were measured using a scintillation counter (Beckman LS6500). We also  
339 performed this assay in a reaction buffer containing higher salt (50.0 mM NaCl) and observed  
340 consistent results (dose dependent inhibition of m<sup>6</sup>dA activity of METTL3-METTL14 by small,  
341 structured RNA oligos) as presented in Figure 2e. Results presented here are an average of three  
342 independent experiments ( $n = 3$ ) with one standard deviation (s.d.) for each oligonucleotide shown  
343 as error bars. Source data are provided as a Source Data file. The results of two groups in fig. 3c  
344 were derived from three independent experiments and were analyzed using two-tailed Student's  
345 T-test (unpaired).

346

347 *Quantitation of methylation and validation of identity of methylated base by mass spectrometry*

348

349 Methylation reactions were carried out in a 10  $\mu$ L mixture containing 50 mM Tris-HCl, pH 7.5, 5  
350 mM NaCl, 1 mM DTT, 200  $\mu$ M SAM, 10  $\mu$ M substrate RNA/DNA probe, and 1  $\mu$ M METTL3-  
351 METTL14 enzyme complex. The reactions were incubated at 37 °C for 1 hour, followed by  
352 incubation with 0.8 units of proteinase K (New England Biolabs) at 37 °C for 10 minutes. Two



353 microliters of each reaction were subjected to oligonucleotide intact mass analysis by Liquid  
354 Chromatography-Mass Spectrometry (LC-MS) as described previously<sup>50</sup>. The raw data was  
355 deconvoluted using ProMass HR (Novatia, LCC). The deconvoluted-mass peak area ratio between  
356 reactants and expected products was used to estimate the percentage of methylation. Results from  
357 three independent experiments ( $n = 3$ ) are shown. To verify the identity of the modified  
358 nucleotides, METTL3-METTL14 reactions were also subjected to nucleoside analysis. Briefly, 8  
359  $\mu$ L of each of reaction were purified using Oligo Clean-Up and Concentration Kit (Norgen Biotek)  
360 according to manufacturer's instructions. The nucleic acids were eluted in 20  $\mu$ L nuclease-free  
361 water. To seventeen microliters of the eluates were added 2  $\mu$ L of 10x Nucleoside Digestion Mix  
362 reaction buffer and 1  $\mu$ L of Nucleoside Digestion Mix (New England Biolabs). Reactions were  
363 incubated at 37 °C for 1 hour. The entirety of the nucleoside digestion reaction was subjected to  
364 Ultra-High-Performance Liquid Chromatography (UHPLC) or UHPLC-MS analysis without  
365 purification. UHPLC analysis was performed on an Agilent 1290 Infinity II system equipped with  
366 a G7117A diode array detector (DAD). UHPLC-MS analysis was performed an Agilent 1290  
367 Infinity II system equipped with a G7117A DAD detector and a 6135 XT mass detector. LC  
368 separations were carried out using a Waters XSelect HSS T3 XP column (2.1  $\times$  100 mm, 2.5  $\mu$ m)  
369 with the gradient mobile phase consisting of methanol and 10 mM ammonium acetate buffer (pH  
370 4.5). The identity of each nucleoside was confirmed by analysis of the LC retention times relative  
371 to authentic standards and by mass spectrometric analysis. The relative abundance of each  
372 nucleoside was determined by UV absorbance.

373

374

375 *Determining the nucleic acid-binding affinities of METTL3-METTL14 and METTL3-METTL14.*

376 *RGG*

377

378 Fluorescence polarization (FP)-based assay was used to measure equilibrium dissociation binding

379 constants ( $K_d$ ). The reactions were carried out in a buffer 0.01 M HEPES pH 7.5 and 0.05 M KCl.

380 All oligonucleotides contain a fluorescein moiety covalently attached to the 5'-end. A constant

381 concentration of the fluorescein labeled oligo (1 nM) was used with increasing concentrations of

382 full-length METTL3-METTL14 protein or its truncated version (METTL3-METTL14-<sub>RGG</sub> (0 -

383 2000 nM) in a 384-well plate. Significant changes in fluorescence polarization upon increasing

384 concentrations of protein were indicative of direct binding. The fluorescence polarization

385 (emission wavelength = 530 nm, excitation wavelength = 485 nm) value for each dilution was

386 measured using PHERAstar FS (BMG Labtech). The buffer corrected values were used to

387 calculate the equilibrium dissociation constant ( $K_d$ ) for protein-DNA/RNA binding using a simple

388 1:1 specific binding model ( $Y=B_{max} * X / (K_d + X)$ , where X denotes the concentration of protein

389 ligand, Y = specific binding,  $B_{max}$  = maximum binding,  $K_d$  = equilibrium dissociation constant in

390 same units as X). Data were fitted by a single-site binding model in GraphPad Prism (GraphPad

391 Software, San Diego, CA). Results presented here are an average of three independent experiments

392 ( $n = 3$ ) with one standard deviation (s.d.) for each oligonucleotide shown as error bars. Source data

393 are provided as a Source Data file.

394

### 395 **DATA AVAILABILITY**

396 The information about coding sequences of human METTL3 (NCBI reference sequence

397 GI: 33301371) and METTL14 (NCBI reference sequence GI: 172045930) used in this study is

398 available at NCBI. Source data are provided as a separate Source Data file. Correspondence and  
399 requests for material should be addressed to Y.K.G. ([guptay@uthscsa.edu](mailto:guptay@uthscsa.edu)).

400

## 401 REFERENCES

- 402
- 403 [1] Desrosiers, R., Friderici, K., and Rottman, F. (1974) Identification of methylated nucleosides  
404 in messenger RNA from Novikoff hepatoma cells, *Proc Natl Acad Sci U S A* 71, 3971-  
405 3975.
- 406 [2] Bokar, J. A., Rath-Shambaugh, M. E., Ludwiczak, R., Narayan, P., and Rottman, F. (1994)  
407 Characterization and partial purification of mRNA N6-adenosine methyltransferase from  
408 HeLa cell nuclei. Internal mRNA methylation requires a multisubunit complex, *J Biol*  
409 *Chem* 269, 17697-17704.
- 410 [3] Rottman, F. M., Bokar, J. A., Narayan, P., Shambaugh, M. E., and Ludwiczak, R. (1994) N6-  
411 adenosine methylation in mRNA: substrate specificity and enzyme complexity,  
412 *Biochimie* 76, 1109-1114.
- 413 [4] Dominissini, D., Moshitch-Moshkovitz, S., Schwartz, S., Salmon-Divon, M., Ungar, L.,  
414 Osenberg, S., Cesarkas, K., Jacob-Hirsch, J., Amariglio, N., Kupiec, M., Sorek, R., and  
415 Rechavi, G. (2012) Topology of the human and mouse m6A RNA methylomes revealed  
416 by m6A-seq, *Nature* 485, 201-206.
- 417 [5] Meyer, K. D., Saletore, Y., Zumbo, P., Elemento, O., Mason, C. E., and Jaffrey, S. R. (2012)  
418 Comprehensive analysis of mRNA methylation reveals enrichment in 3' UTRs and near  
419 stop codons, *Cell* 149, 1635-1646.
- 420 [6] Ke, S., Pandya-Jones, A., Saito, Y., Fak, J. J., Vagbo, C. B., Geula, S., Hanna, J. H., Black,  
421 D. L., Darnell, J. E., Jr., and Darnell, R. B. (2017) m(6)A mRNA modifications are  
422 deposited in nascent pre-mRNA and are not required for splicing but do specify  
423 cytoplasmic turnover, *Genes Dev* 31, 990-1006.
- 424 [7] Knuckles, P., Carl, S. H., Musheev, M., Niehrs, C., Wenger, A., and Buhler, M. (2017) RNA  
425 fate determination through cotranscriptional adenosine methylation and microprocessor  
426 binding, *Nat Struct Mol Biol* 24, 561-569.
- 427 [8] Liu, J., Dou, X., Chen, C., Chen, C., Liu, C., Xu, M. M., Zhao, S., Shen, B., Gao, Y., Han,  
428 D., and He, C. (2020) N (6)-methyladenosine of chromosome-associated regulatory RNA  
429 regulates chromatin state and transcription, *Science* 367, 580-586.
- 430 [9] Batista, P. J., Molinie, B., Wang, J., Qu, K., Zhang, J., Li, L., Bouley, D. M., Lujan, E.,  
431 Haddad, B., Daneshvar, K., Carter, A. C., Flynn, R. A., Zhou, C., Lim, K. S., Dedon, P.,  
432 Wernig, M., Mullen, A. C., Xing, Y., Giallourakis, C. C., and Chang, H. Y. (2014) m(6)A  
433 RNA modification controls cell fate transition in mammalian embryonic stem cells, *Cell*  
434 *Stem Cell* 15, 707-719.
- 435 [10] Geula, S., Moshitch-Moshkovitz, S., Dominissini, D., Mansour, A. A., Kol, N., Salmon-  
436 Divon, M., Hershkovitz, V., Peer, E., Mor, N., Manor, Y. S., Ben-Haim, M. S., Eyal, E.,  
437 Yunger, S., Pinto, Y., Jaitin, D. A., Viukov, S., Rais, Y., Krupalnik, V., Chomsky, E.,  
438 Zerbib, M., Maza, I., Rechavi, Y., Massarwa, R., Hanna, S., Amit, I., Levanon, E. Y.,  
439 Amariglio, N., Stern-Ginossar, N., Novershtern, N., Rechavi, G., and Hanna, J. H. (2015)  
440 Stem cells. m6A mRNA methylation facilitates resolution of naive pluripotency toward  
441 differentiation, *Science* 347, 1002-1006.
- 442 [11] Lin, S., Choe, J., Du, P., Triboulet, R., and Gregory, R. I. (2016) The m(6)A  
443 Methyltransferase METTL3 Promotes Translation in Human Cancer Cells, *Mol Cell* 62,  
444 335-345.
- 445 [12] Barbieri, I., Tzelepis, K., Pandolfini, L., Shi, J., Millan-Zambrano, G., Robson, S. C.,  
446 Aspris, D., Migliori, V., Bannister, A. J., Han, N., De Braekeleer, E., Ponstingl, H.,

- 447 Hendrick, A., Vakoc, C. R., Vassiliou, G. S., and Kouzarides, T. (2017) Promoter-bound  
448 METTL3 maintains myeloid leukaemia by m(6)A-dependent translation control, *Nature*  
449 552, 126-131.
- 450 [13] Vu, L. P., Pickering, B. F., Cheng, Y., Zaccara, S., Nguyen, D., Minuesa, G., Chou, T.,  
451 Chow, A., Saletore, Y., MacKay, M., Schulman, J., Famulare, C., Patel, M., Klimek, V.  
452 M., Garrett-Bakelman, F. E., Melnick, A., Carroll, M., Mason, C. E., Jaffrey, S. R., and  
453 Kharas, M. G. (2017) The N6-methyladenosine (m6A)-forming enzyme METTL3  
454 controls myeloid differentiation of normal hematopoietic and leukemia cells, *Nat Med*.
- 455 [14] Choe, J., Lin, S., Zhang, W., Liu, Q., Wang, L., Ramirez-Moya, J., Du, P., Kim, W., Tang,  
456 S., Sliz, P., Santisteban, P., George, R. E., Richards, W. G., Wong, K. K., Locker, N.,  
457 Slack, F. J., and Gregory, R. I. (2018) mRNA circularization by METTL3-eIF3h  
458 enhances translation and promotes oncogenesis, *Nature* 561, 556-560.
- 459 [15] Xiang, Y., Laurent, B., Hsu, C. H., Nachtergaele, S., Lu, Z., Sheng, W., Xu, C., Chen, H.,  
460 Ouyang, J., Wang, S., Ling, D., Hsu, P. H., Zou, L., Jambhekar, A., He, C., and Shi, Y.  
461 (2017) RNA m6A methylation regulates the ultraviolet-induced DNA damage response,  
462 *Nature* 543, 573-576.
- 463 [16] Zhang, C., Chen, L., Peng, D., Jiang, A., He, Y., Zeng, Y., Xie, C., Zhou, H., Luo, X., Liu,  
464 H., Chen, L., Ren, J., Wang, W., and Zhao, Y. (2020) METTL3 and N6-Methyladenosine  
465 Promote Homologous Recombination-Mediated Repair of DSBs by Modulating DNA-  
466 RNA Hybrid Accumulation, *Mol Cell* 79, 425-442 e427.
- 467 [17] Liu, J., Yue, Y., Han, D., Wang, X., Fu, Y., Zhang, L., Jia, G., Yu, M., Lu, Z., Deng, X.,  
468 Dai, Q., Chen, W., and He, C. (2014) A METTL3-METTL14 complex mediates  
469 mammalian nuclear RNA N6-adenosine methylation, *Nat Chem Biol* 10, 93-95.
- 470 [18] Bujnicki, J. M., Feder, M., Radlinska, M., and Blumenthal, R. M. (2002) Structure  
471 prediction and phylogenetic analysis of a functionally diverse family of proteins  
472 homologous to the MT-A70 subunit of the human mRNA:m(6)A methyltransferase, *J*  
473 *Mol Evol* 55, 431-444.
- 474 [19] Woodcock, C. B., Horton, J. R., Zhang, X., Blumenthal, R. M., and Cheng, X. (2020) Beta  
475 class amino methyltransferases from bacteria to humans: evolution and structural  
476 consequences, *Nucleic Acids Res* 48, 10034-10044.
- 477 [20] Gupta, Y. K., Chan, S. H., Xu, S. Y., and Aggarwal, A. K. (2015) Structural basis of  
478 asymmetric DNA methylation and ATP-triggered long-range diffusion by EcoP15I, *Nat*  
479 *Commun* 6, 7363.
- 480 [21] Wang, X., Feng, J., Xue, Y., Guan, Z., Zhang, D., Liu, Z., Gong, Z., Wang, Q., Huang, J.,  
481 Tang, C., Zou, T., and Yin, P. (2016) Structural basis of N(6)-adenosine methylation by  
482 the METTL3-METTL14 complex, *Nature* 534, 575-578.
- 483 [22] Sledz, P., and Jinek, M. (2016) Structural insights into the molecular mechanism of the  
484 m(6)A writer complex, *Elife* 5.
- 485 [23] Malone, T., Blumenthal, R. M., and Cheng, X. (1995) Structure-guided analysis reveals nine  
486 sequence motifs conserved among DNA amino-methyltransferases, and suggests a  
487 catalytic mechanism for these enzymes, *J Mol Biol* 253, 618-632.
- 488 [24] Linder, B., Grozhik, A. V., Olarerin-George, A. O., Meydan, C., Mason, C. E., and Jaffrey,  
489 S. R. (2015) Single-nucleotide-resolution mapping of m6A and m6Am throughout the  
490 transcriptome, *Nat Methods* 12, 767-772.
- 491 [25] Dubin, D. T., and Taylor, R. H. (1975) The methylation state of poly A-containing  
492 messenger RNA from cultured hamster cells, *Nucleic Acids Res* 2, 1653-1668.

- 493 [26] Slobodin, B., Han, R., Calderone, V., Vrieland, J., Loayza-Puch, F., Elkon, R., and Agami,  
494 R. (2017) Transcription Impacts the Efficiency of mRNA Translation via Co-  
495 transcriptional N6-adenosine Methylation, *Cell* 169, 326-337 e312.
- 496 [27] Huang, H., Weng, H., Zhou, K., Wu, T., Zhao, B. S., Sun, M., Chen, Z., Deng, X., Xiao, G.,  
497 Auer, F., Klemm, L., Wu, H., Zuo, Z., Qin, X., Dong, Y., Zhou, Y., Qin, H., Tao, S., Du,  
498 J., Liu, J., Lu, Z., Yin, H., Mesquita, A., Yuan, C. L., Hu, Y. C., Sun, W., Su, R., Dong,  
499 L., Shen, C., Li, C., Qing, Y., Jiang, X., Wu, X., Sun, M., Guan, J. L., Qu, L., Wei, M.,  
500 Muschen, M., Huang, G., He, C., Yang, J., and Chen, J. (2019) Histone H3 trimethylation  
501 at lysine 36 guides m(6)A RNA modification co-transcriptionally, *Nature* 567, 414-419.
- 502 [28] Patil, D. P., Chen, C. K., Pickering, B. F., Chow, A., Jackson, C., Guttman, M., and Jaffrey,  
503 S. R. (2016) m(6)A RNA methylation promotes XIST-mediated transcriptional  
504 repression, *Nature* 537, 369-373.
- 505 [29] Liu, N., Dai, Q., Zheng, G., He, C., Parisien, M., and Pan, T. (2015) N(6)-methyladenosine-  
506 dependent RNA structural switches regulate RNA-protein interactions, *Nature* 518, 560-  
507 564.
- 508 [30] Xiang, Y., Laurent, B., Hsu, C. H., Nachtergaele, S., Lu, Z., Sheng, W., Xu, C., Chen, H.,  
509 Ouyang, J., Wang, S., Ling, D., Hsu, P. H., Zou, L., Jambhekar, A., He, C., and Shi, Y.  
510 (2017) RNA m(6)A methylation regulates the ultraviolet-induced DNA damage response,  
511 *Nature* 543, 573-576.
- 512 [31] Burgess, H. M., Depledge, D. P., Thompson, L., Srinivas, K. P., Grande, R. C., Vink, E. I.,  
513 Abebe, J. S., Blackaby, W. P., Hendrick, A., Albertella, M. R., Kouzarides, T.,  
514 Stapleford, K. A., Wilson, A. C., and Mohr, I. (2021) Targeting the m(6)A RNA  
515 modification pathway blocks SARS-CoV-2 and HCoV-OC43 replication, *Genes Dev* 35,  
516 1005-1019.
- 517 [32] Li, N., Hui, H., Bray, B., Gonzalez, G. M., Zeller, M., Anderson, K. G., Knight, R., Smith,  
518 D., Wang, Y., Carlin, A. F., and Rana, T. M. (2021) METTL3 regulates viral m6A RNA  
519 modification and host cell innate immune responses during SARS-CoV-2 infection, *Cell*  
520 *Rep* 35, 109091.
- 521 [33] Woodcock, C. B., Yu, D., Hajian, T., Li, J., Huang, Y., Dai, N., Correa, I. R., Jr., Wu, T.,  
522 Vedadi, M., Zhang, X., and Cheng, X. (2019) Human MettL3-MettL14 complex is a  
523 sequence-specific DNA adenine methyltransferase active on single-strand and unpaired  
524 DNA in vitro, *Cell Discov* 5, 63.
- 525 [34] Musheev, M. U., Baumgartner, A., Krebs, L., and Niehrs, C. (2020) The origin of genomic  
526 N(6)-methyl-deoxyadenosine in mammalian cells, *Nat Chem Biol* 16, 630-634.
- 527 [35] Wang, P., Doxtader, K. A., and Nam, Y. (2016) Structural Basis for Cooperative Function  
528 of Mettl3 and Mettl14 Methyltransferases, *Mol Cell* 63, 306-317.
- 529 [36] Krissinel, E., and Henrick, K. (2004) Secondary-structure matching (SSM), a new tool for  
530 fast protein structure alignment in three dimensions, *Acta Crystallogr D Biol Crystallogr*  
531 60, 2256-2268.
- 532 [37] Thandapani, P., O'Connor, T. R., Bailey, T. L., and Richard, S. (2013) Defining the  
533 RGG/RG motif, *Mol Cell* 50, 613-623.
- 534 [38] Scholler, E., Weichmann, F., Treiber, T., Ringle, S., Treiber, N., Flatley, A., Feederle, R.,  
535 Bruckmann, A., and Meister, G. (2018) Interactions, localization, and phosphorylation of  
536 the m(6)A generating METTL3-METTL14-WTAP complex, *RNA* 24, 499-512.

- 537 [39] Oberstrass, F. C., Lee, A., Stefl, R., Janis, M., Chanfreau, G., and Allain, F. H. (2006)  
538 Shape-specific recognition in the structure of the Vts1p SAM domain with RNA, *Nat*  
539 *Struct Mol Biol* 13, 160-167.
- 540 [40] Alarcon, C. R., Lee, H., Goodarzi, H., Halberg, N., and Tavazoie, S. F. (2015) N6-  
541 methyladenosine marks primary microRNAs for processing, *Nature* 519, 482-485.
- 542 [41] Yang, L., Lin, C., Liu, W., Zhang, J., Ohgi, K. A., Grinstead, J. D., Dorrestein, P. C., and  
543 Rosenfeld, M. G. (2011) ncRNA- and Pc2 methylation-dependent gene relocation  
544 between nuclear structures mediates gene activation programs, *Cell* 147, 773-788.
- 545 [42] Garcia-Campos, M. A., Edelheit, S., Toth, U., Safra, M., Shachar, R., Viukov, S., Winkler,  
546 R., Nir, R., Lasman, L., Brandis, A., Hanna, J. H., Rossmanith, W., and Schwartz, S.  
547 (2019) Deciphering the "m(6)A Code" via Antibody-Independent Quantitative Profiling,  
548 *Cell* 178, 731-747 e716.
- 549 [43] Zhang, S., Zhao, B. S., Zhou, A., Lin, K., Zheng, S., Lu, Z., Chen, Y., Sulman, E. P., Xie,  
550 K., Bogler, O., Majumder, S., He, C., and Huang, S. (2017) m6A Demethylase ALKBH5  
551 Maintains Tumorigenicity of Glioblastoma Stem-like Cells by Sustaining FOXM1  
552 Expression and Cell Proliferation Program, *Cancer Cell* 31, 591-606 e596.
- 553 [44] Huang, J., Dong, X., Gong, Z., Qin, L. Y., Yang, S., Zhu, Y. L., Wang, X., Zhang, D., Zou,  
554 T., Yin, P., and Tang, C. (2018) Solution structure of the RNA recognition domain of  
555 METTL3-METTL14 N(6)-methyladenosine methyltransferase, *Protein Cell*.
- 556 [45] Abakir, A., Giles, T. C., Cristini, A., Foster, J. M., Dai, N., Starczak, M., Rubio-Roldan, A.,  
557 Li, M., Eleftheriou, M., Crutchley, J., Flatt, L., Young, L., Gaffney, D. J., Denning, C.,  
558 Dalhus, B., Emes, R. D., Gackowski, D., Correa, I. R., Jr., Garcia-Perez, J. L., Klungland,  
559 A., Gromak, N., and Ruzov, A. (2020) N(6)-methyladenosine regulates the stability of  
560 RNA:DNA hybrids in human cells, *Nat Genet* 52, 48-55.
- 561 [46] Bokar, J. A., Shambaugh, M. E., Polayes, D., Matera, A. G., and Rottman, F. M. (1997)  
562 Purification and cDNA cloning of the AdoMet-binding subunit of the human mRNA  
563 (N6-adenosine)-methyltransferase, *RNA* 3, 1233-1247.
- 564 [47] Schwartz, S., Mumbach, M. R., Jovanovic, M., Wang, T., Maciag, K., Bushkin, G. G.,  
565 Mertins, P., Ter-Ovanesyan, D., Habib, N., Cacchiarelli, D., Sanjana, N. E., Freinkman,  
566 E., Pacold, M. E., Satija, R., Mikkelsen, T. S., Hacohen, N., Zhang, F., Carr, S. A.,  
567 Lander, E. S., and Regev, A. (2014) Perturbation of m6A writers reveals two distinct  
568 classes of mRNA methylation at internal and 5' sites, *Cell Rep* 8, 284-296.
- 569 [48] Douvlataniotis, K., Bensberg, M., Lentini, A., Gylemo, B., and Nestor, C. E. (2020) No  
570 evidence for DNA N (6)-methyladenine in mammals, *Sci Adv* 6, eaay3335.
- 571 [49] Quinodoz, S. A., Bhat, P., Ollikainen, N., Jachowicz, J. W., Banerjee, A. K., Chovanec, P.,  
572 Blanco, M. R., Chow, A., Markaki, Y., Plath, K., and Guttman, M. (2020) RNA promotes  
573 the formation of spatial compartments in the nucleus, *bioRxiv*, 2020.2008.2025.267435.
- 574 [50] Viswanathan, T., Arya, S., Chan, S. H., Qi, S., Dai, N., Misra, A., Park, J. G., Oladunni, F.,  
575 Kovalskyy, D., Hromas, R. A., Martinez-Sobrido, L., and Gupta, Y. K. (2020) Structural  
576 basis of RNA cap modification by SARS-CoV-2, *Nat Commun* 11, 3718.
- 577 [51] Parisien, M., and Major, F. (2008) The MC-Fold and MC-Sym pipeline infers RNA  
578 structure from sequence data, *Nature* 452, 51-55.

579

580

## 581 **ACKNOWLEDGMENTS**

582 This work was partially supported by funding from the Max and Minnie Tomerlin Voelcker  
583 Foundation, San Antonio Partnership for Precision Therapeutics, IIMS/CTSA pilot award, and  
584 laboratory startup funds from the Greehey Children's Cancer Research Institute (GCCRI) of UT  
585 Health San Antonio to Y.K.G. S.Q. is supported by the GCCRI. Y.K.G. is a recipient of a high  
586 impact/high risk award (RP190534) from the Cancer Prevention and Research Institute of Texas  
587 (CPRIT), and a Rising STARS award from the University of Texas System. Y.K.G and M.K.R are  
588 supported by CPRIT grant (RP200110). Y.K.G is grateful for the support from NIH grant  
589 1R01AI161363. S-H.C., N.D. and I.R.C. are grateful to Donald Comb, Jim Ellard and Rich  
590 Roberts for their support of research at New England Biolabs.

591

## 592 **AUTHOR CONTRIBUTIONS**

593 Y.K.G. conceived, designed, and supervised the overall study, and analyzed data; S.Q., J.M.  
594 expressed, and purified proteins, performed biochemical and enzymatic assays, and analyzed data;  
595 S-H.C., N.D., I.R.C. designed and performed LC/MS-based assays, and analyzed data; J.V., and  
596 S.A. optimized conditions of protein expression, and purification, and prepared oligonucleotides  
597 for biochemical assays. R.A.H., M.K.R. provided resources/reagents. Y.K.G. wrote the manuscript  
598 and all authors read and approved this version.

599

## 600 **COMPETING INTERESTS**

601 Y.K.G. is founder of Atomic Therapeutics. S-H. C., N.D., and I.R.C. are employees of New  
602 England Biolabs, a manufacturer and vendor of molecular biology reagents. None of these



603 affiliations affect the authors' impartiality, adherence to journal standards and policies, or  
604 availability of data.

605

606 **MATERIALS AND CORRESPONDENCE**

607 Correspondence and requests for material should be addressed to Y.K.G. (Email:  
608 [guptay@uthscsa.edu](mailto:guptay@uthscsa.edu)).

609

610 **FIGURE LEGENDS**

611 **Figure 1. Structural similarity, purification of methyltransferases, and substrate designing.**

612 **a-b.** Domain architecture of Mod subunit of EcoP15I, human METTL3, and human METTL14  
613 methyltransferases (MTases). All three members belong to the  $\beta$ -class of SAM-dependent MTases  
614 and exhibit a sequential arrangement of motifs (IV-X followed by motif I)<sup>18, 19, 23</sup>. Motif IV  
615 (D/EPPY/W/L) and I are associated with the recognition of target adenine base<sup>20</sup> and co-factor  
616 (SAM) binding<sup>21, 22, 35</sup>, respectively. **c.** Crystal structure of EcoP15I-DNA complex (PDB ID:  
617 4ZCF)<sup>20</sup>: Mod<sub>A</sub> MTase (cyan), Mod<sub>B</sub> MTase (blue), non-methylating DNA strand (grey), target  
618 (methylating) DNA strand (orange), flipped adenine base (red stick). The methyltransferase cores  
619 of Mod<sub>B</sub> and Mod<sub>A</sub> are shown in dark blue and light pink, respectively. The Res subunit of EcoP15I  
620 was omitted for clarity. **d.** MTase domains of two Mod subunits (ModA/B) of EcoP15I with target  
621 DNA strand. The regions flanking the methyltransferase core (e.g., CTD and TRD) are omitted for  
622 clarity. Only the region encompassing the MTase core (aa 90-132, 169-261, and 385-511) of  
623 EcoP15I Mod was selected for the alignment with the methyltransferase core of METTL3 (aa 358-  
624 580) and METTL14 (aa 165-378). **e.** An overlay of MTase domains of EcoP15I and METTL14  
625 (PDB ID: 5IL0) shows structural similarity within MTase folds (rmsd = 2.55Å over 278 C $\alpha$  atoms).  
626 RNA strand here was modeled based on the respective methylating strand in the EcoP15I structure.  
627 **f.** Chromatogram of final size exclusion chromatography (SEC) step of purification showing  
628 METTL3-METTL14 complexes (left, full-length; right, METL3-METTL14<sub>[-RGG]</sub>) co-eluted as  
629 single homogenous species. Blue, absorbance at 280 nm; green, absorbance at 260 nm (A260).  
630 Coomassie stained gels (lower panels) confirm high purity of METTL3-METTL14 proteins in the  
631 SEC peak fractions. **g.** Sequence of DNA and RNA oligonucleotides used in this study. All oligos  
632 have a covalently attached 5'-fluorescein (not shown). **h.** Secondary structure of rNEAT2 and its

633 3-D model as predicted by MC-SYM<sup>51</sup>. rNEAT2 harbors a potential DRACH motif (yellow line).

634 *i.* Secondary structure of rTCE23 RNA and its solution NMR structure (PDB ID: 2ES5)<sup>39</sup>.

635

636 **Figure 2. RNA-mediated restriction of METTL3-METTL14 activity**

637 *a.* Methyltransferase activity of METTL3-METTL14 in the presence of various DNA or RNA

638 substrates measured by radiometric assay. CPM, counts per minute. The highest activity was

639 measured with the d6T\* oligo. *b.* FP-based binding assay for DNA and RNA oligos showing

640 highest affinity for rNEAT2 RNA (green), and lowest affinity for d6T\* oligo (red). Equilibrium

641 dissociation constants (Kd) for each oligo are shown on the right side of the isotherms. The data

642 were fit into one site specific binding model ( $Y=B_{max} * X / (K_d + X)$ ). See methods section and

643 source data for details. *c.* Methyltransferase activity of METTL3-METTL14 on the respective

644 RNA oligos (red), d6T\* DNA alone (black) and equimolar mixture of the two (blue), measured by

645 radiometric assay. *d.* predicted secondary structures of each oligonucleotide. yellow, RNA strand;

646 black, DNA strand. The values of the equilibrium dissociation constants (Kd) shown for each

647 oligonucleotide indicate an inverse relationship between binding affinity and methyltransferase

648 activity. *e.* dose-dependent inhibition of METTL3-METTL14 activity by RNA oligos rNEAT2 or

649 rTCE23, as measured by radiometric assay in a reaction buffer containing 5.0 mM NaCl (upper

650 panel) and 50.0 mM NaCl (lower panel). IC<sub>50</sub>, concentration of RNA required to achieve 50%

651 inhibition of the METTL3-METTL14 activity. *f.* Attenuation of the methyltransferase activity in

652 presence of rNEAT2 or rTCE23, as measured by oligonucleotide intact mass analysis. Quantitation

653 of modified dA (black circle) or rA (red square) is shown in absence or presence of equivalent

654 amounts of rNEAT2 or rTCE23. *g.* Nucleoside composition analysis of the METTL3-METTL14

655 reactions. UHPLC chromatograms showing the reaction in absence (blue trace) or in the presence

656 of either rNEAT2 (red trace) or rTCE23 (green trace). The quantitation of the fraction of modified  
657 bases in the nucleoside pool was consistent with the results from the oligonucleotide intact mass  
658 analysis shown in *f*. The insert shows the full chromatographic trace with all detected nucleosides.  
659 Results presented in panels *a-c* and *e-f* are the average of three independent experiments ( $n = 3$ )  
660 with one standard deviation (s.d.) for each oligonucleotide (shown as error bars). Source data are  
661 provided as a Source Data file.

662

663 **Figure 3. Role of RGG motifs and model of RNA-mediated regulation of methyltransferase**  
664 **activity**

665 *a*. Domain architecture of METTL3 and METTL14. LH, leader helix; NLS, nuclear localization  
666 signal; ZnF1/2, zinc-finger domain 1/2; RGG, arginine-glycine rich repeats motif. *b*. FP-based  
667 binding assay for DNA and RNA oligos showing the highest affinity of METTL3-METTL14<sub>(-RGG)</sub>  
668 for rNEAT2 RNA (green) and lowest affinity for d6T\* (red). Equilibrium dissociation constants  
669 (K<sub>d</sub>) for each oligo are shown. The data were fit into one site specific binding model  
670 ( $Y = B_{max} * X / (K_d + X)$ ). See methods section and source data for details. *c*. Relative  
671 methyltransferase activity of full-length METTL3-METTL14 and the truncated enzyme devoid of  
672 the RGG motif in METTL14 ([METTL3-METTL14<sub>(-RGG)</sub>]) in the presence of d6T\*, rNEAT2, or  
673 an equimolar mixture of these two oligos, as measured by radiometric assay. Results presented are  
674 the average of three independent experiments ( $n = 3$ ) with one standard deviation (s.d.) for each  
675 oligonucleotide (shown as error bars). The results of two groups were analyzed and compared  
676 using two-tailed Student's unpaired T-test (P value <0.0001). Details about Student's T-test are  
677 provided in the source data file. *d*, *e*. Proposed models showing that the METTL3-METTL14  
678 complex can methylate a target adenine (yellow) in a single-stranded DNA region (black).

679 Structured motifs present in ncRNA/mRNAs (orange) can block the methyltransferase activity by

680 a shape-dependent binding of these RNAs to METTL3-METTL14.

681

682

683  
684

**table 1**

| Nucleic acid substrate | Kd in nM (range of Kd in nM) |                       |
|------------------------|------------------------------|-----------------------|
|                        | full-length METTL3-METTL14   | METTL3-METTL14-RGG    |
| <b>RNA</b>             |                              |                       |
| rNEAT2                 | 2.1 (1.8 – 2.3)              | 21.2 (19.2 – 23.5)    |
| rNEAT2*                | 13.0 (12.3 – 13.8)           | 274.1 (150.7 – 497.2) |
| rTCE23                 | 25.6 (23.2 – 28.5)           | 413 (341 – 502)       |
| rPal-top+bot           | 127 (97.2 – 167)             | 257 (132 – 491)       |
| rFoxM1-p1              | 294 (245 – 354)              | 920 (480 – 1940)      |
| r6T                    | 114 (103 – 127)              | 704 (323 – 1668)      |
| <b>DNA</b>             |                              |                       |
| d6T                    | 370 (343 – 401)              | 2097 (1494 – >2000)   |
| d6T*                   | 509 (470 – 553)              | >2000                 |

685  
686

687

figure 1

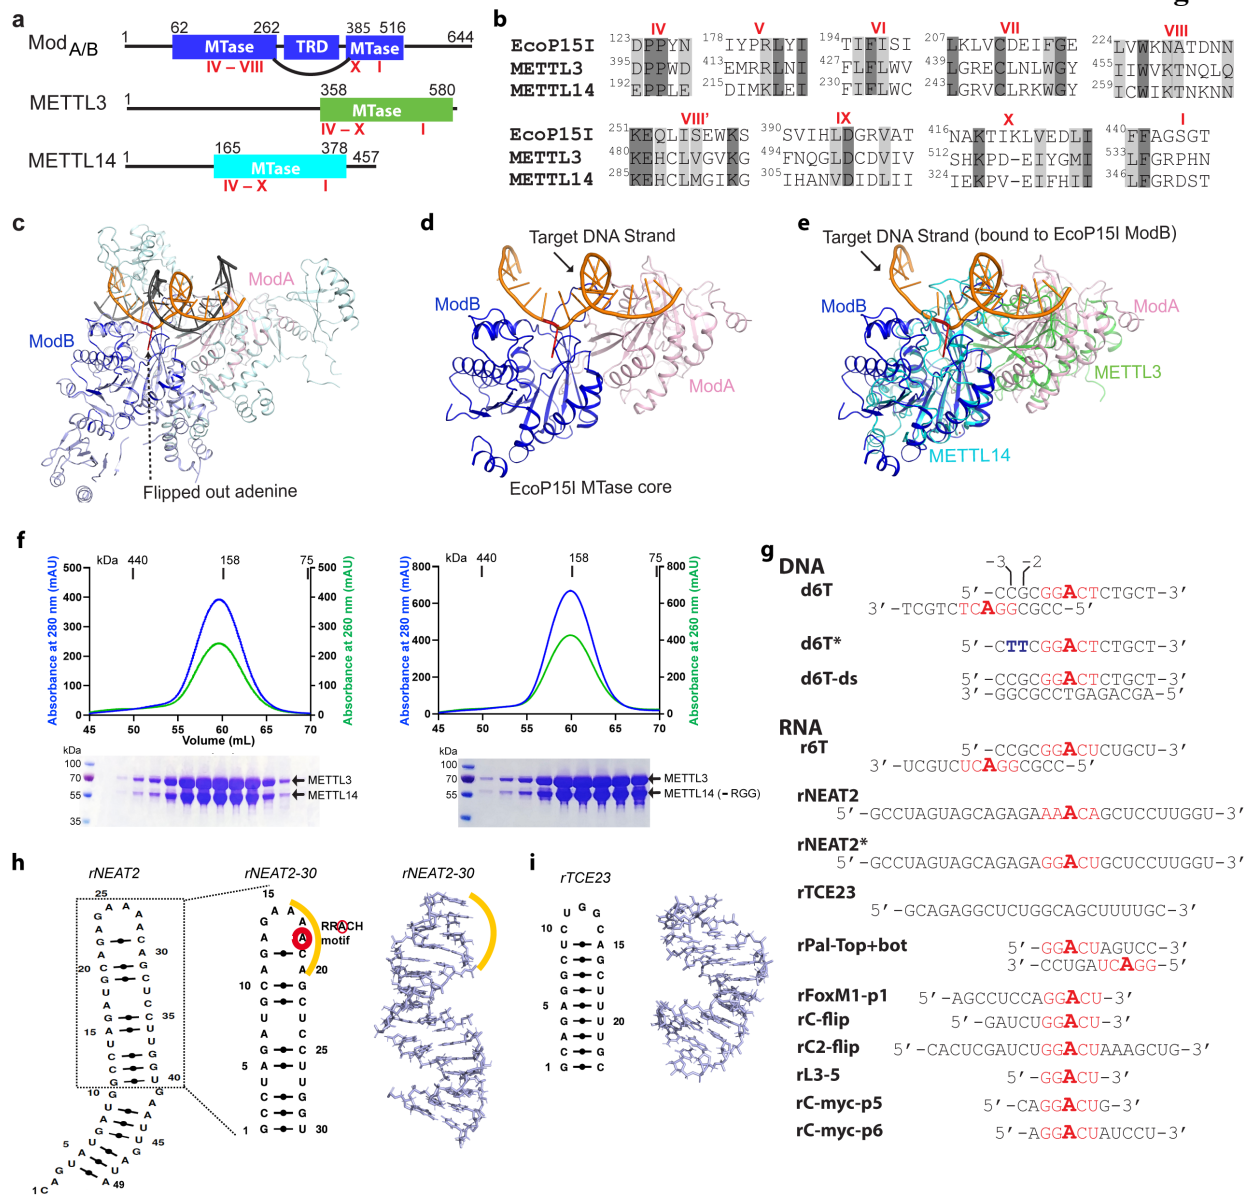

688

689

690

figure 2

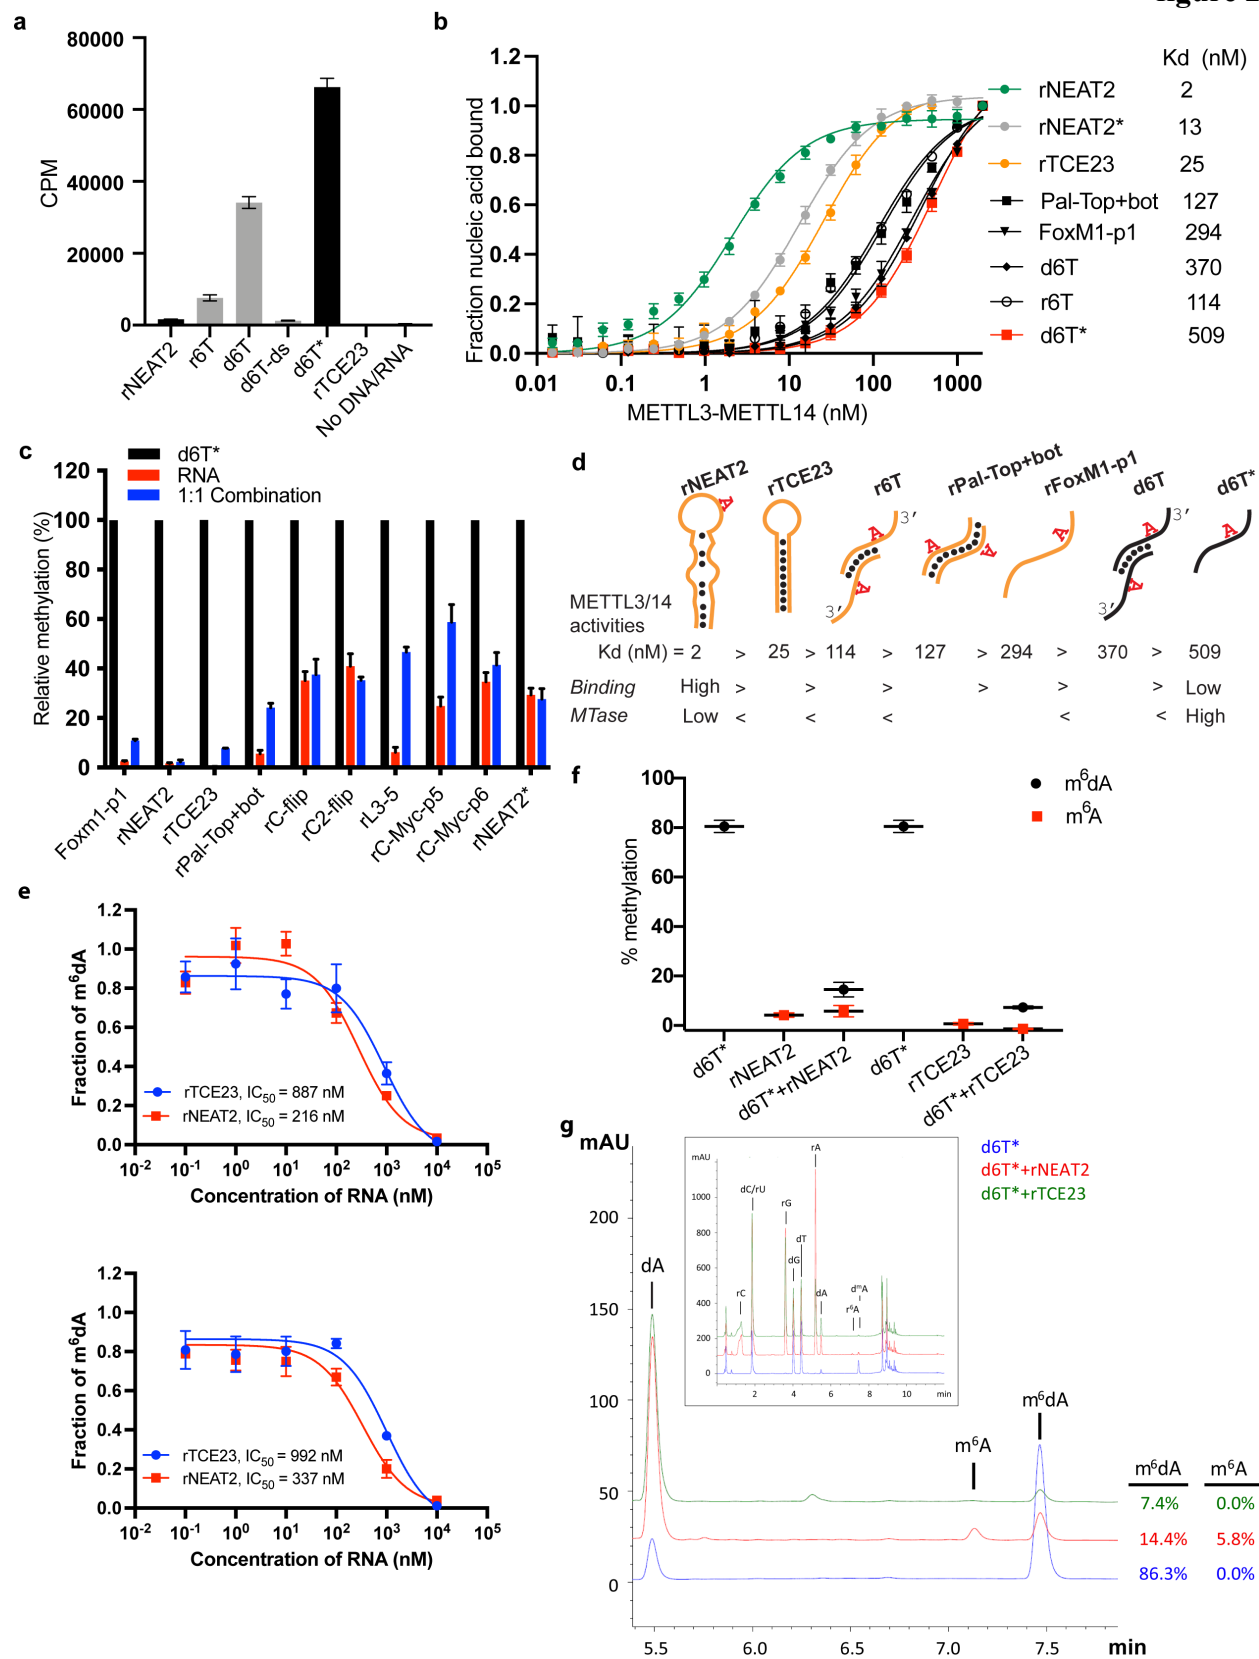

691  
692

32



693

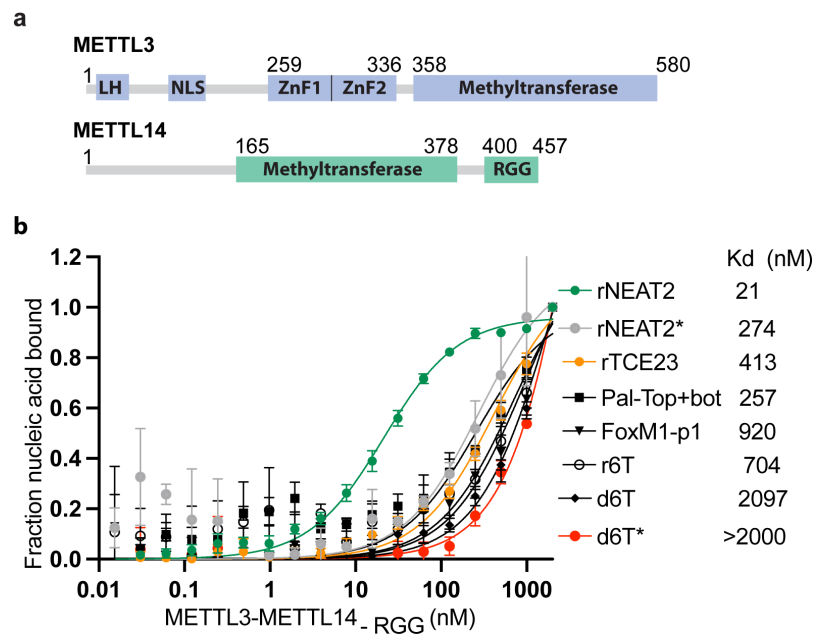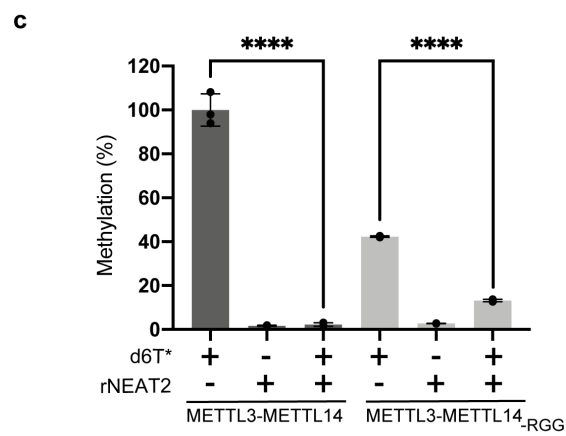

**figure 3**

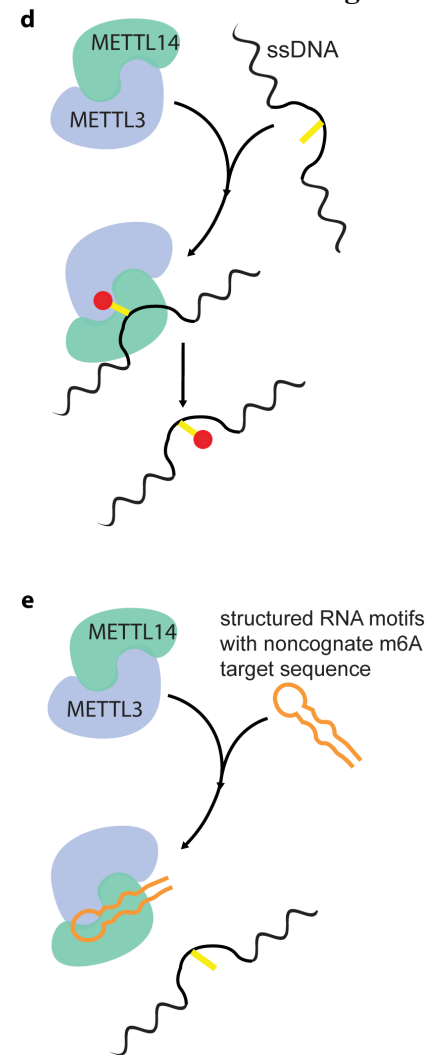

694

695  
696  
697  
698  
699  
700  
701  
702  
703  
704  
705  
706  
707  
708  
709  
710  
711  
712  
713  
714  
715  
716  
717  
718  
719  
720

## Supplementary information

### **RNA binding to human METTL3-METTL14 restricts *N*<sup>6</sup>-deoxyadenosine methylation of DNA *in vitro***

Shan Qi<sup>1,2,#</sup>, Javier Mota<sup>1,#</sup>, Siu-Hong Chan<sup>3</sup>, Johanna Villarreal<sup>1</sup>, Nan Dai<sup>3</sup>, Shailee Arya<sup>1</sup>,  
Robert A. Hromas<sup>4</sup>, Manjeet K. Rao<sup>1</sup>, Ivan R. Corrêa Jr.<sup>3</sup>, Yogesh K. Gupta<sup>1,2,5\*</sup>

<sup>1</sup> Greehey Children’s Cancer Research Institute, University of Texas Health at San Antonio  
8403 Floyd Curl Drive, San Antonio, TX 78229, USA

<sup>2</sup> Department of Biochemistry and Structural Biology, University of Texas Health at San Antonio  
7703 Floyd Curl Drive, San Antonio, TX 78229, USA

<sup>3</sup> New England Biolabs, 240 County Road, Ipswich, MA, 01938, USA

<sup>4</sup> Division of Hematology and Medical Oncology, Department of Medicine, University of Texas  
Health at San Antonio  
7703 Floyd Curl Drive, San Antonio, TX 78229, USA

<sup>5</sup> Lead contact

\*Corresponding author:

Y.K.G email: [guptay@uthscsa.edu](mailto:guptay@uthscsa.edu)

# These authors contributed equally to this work

721

supplementary figure 1

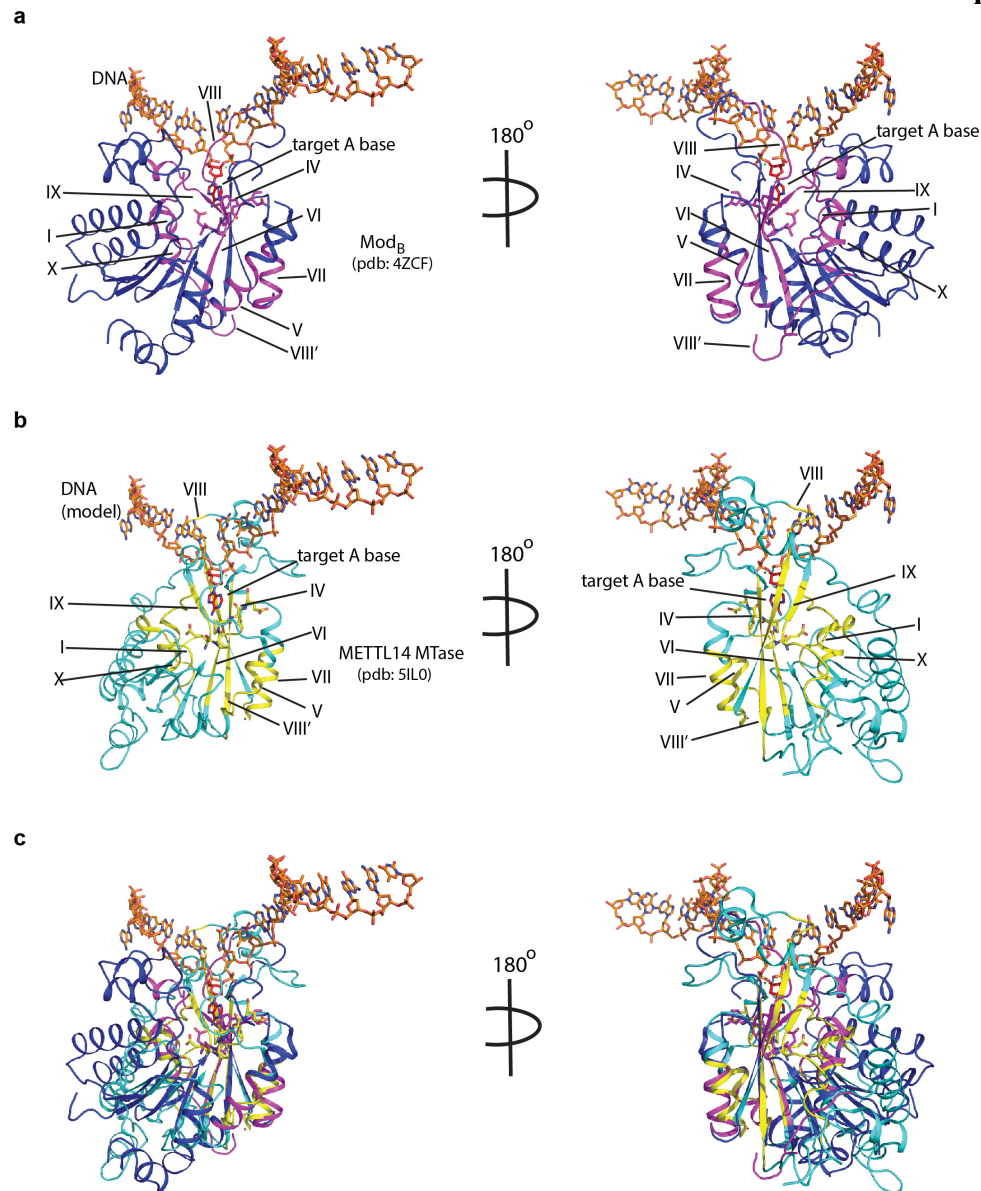

722

723

724 **S. Figure 1. Mode of DNA recognition.** *a.* Blue ribbons, the MTase core (Mod<sub>B</sub>) of EcoP15I (aa  
 725 90-132, 169-261, 385-511 from PDB: 4ZCF) in complex with the target DNA strand (orange  
 726 sticks). The conserved motifs in class  $\beta$  MTases are shown in magenta. The motif IV  
 727 (D/EPPY/W/L) that surrounds the watson-edge edge of the flipped target adenine base (red) is  
 728 shown in stick mode. *b.* Cyan ribbons, MTase core of human METTL14 (PDB: 5IL0) with a  
 729 modeled ssDNA as in Mod<sub>B</sub>. The conserved motifs are colored in yellow. *c.* An overlay of MTases  
 730 of Mod<sub>B</sub> and METTL14 was performed using the SSM method (secondary structure-based) that  
 731 yielded an rmsd of 2.55 over 282aa of METTL14 aligned with 278aa of Mod<sub>B</sub>. The canonical  
 732 MTase motifs, including motif IV, in two MTases overlay well. Due to lack of structures of  
 733 METTL3 or Mod<sub>A</sub> (in complex with a flipped adenine base), we chose Mod<sub>B</sub> and METTL14 for  
 734 this superposition. We could not model RGG motifs due to the lack of predicted structure for this  
 735 region.
